# Supplementary material for: Zeolite encapsulated Ni(ii) and Cu(ii) complexes with tetradentate N2O2 Schiff base ligand: catalytic activity towards oxidation of benzhydrol and degradation of rhodamine-B
Source: Royal Society of Chemistry journal article supplement (doi:10.1039/c4ta01869a), 2014-01-01
Supplement: c4ta01869a1.pdf [file c4ta01869a1.pdf]

### Electronic Supplementary Information

#### Zeolite Encapsulated Ni(II) and Cu(II) Complexes with Tetradentate N<sub>2</sub>O<sub>2</sub> Schiff Base Ligand: Catalytic Activity Towards Oxidation of Benzhydrol and Degradation of Rhodamine-B

G. Ramanjaneya Reddy,<sup>a</sup> S. Balasubramanian,<sup>a</sup> K. Chennakesavulu<sup>b\*</sup>

<sup>a</sup>Department of Inorganic Chemistry, School of Chemical Sciences, University of Madras,  
Guindy Campus, Chennai-600 025, India.

<sup>b</sup>Department of Chemistry and International Research Centre, Sathyabama University,  
Jeppiaar Nagar, Chennai - 600 119, India..

\*Corresponding author: chennanml@yahoo.com, gonturamunom@gmail.com.

Tel.: +91 9994228166, 044 22202794

#### Table of contents

| Figure   |                                                                                                                                                       | Page no |
|----------|-------------------------------------------------------------------------------------------------------------------------------------------------------|---------|
| S1-2     | <sup>1</sup> H and <sup>13</sup> C-NMR spectra of H <sub>2</sub> L                                                                                    | 3       |
| S3-5     | ESI-MS analytical data of H <sub>2</sub> L, Ni(II)L.2ClO <sub>4</sub> & Cu(II)L.2ClO <sub>4</sub>                                                     | 4-5     |
| S6-12    | FTIR spectra of the SAL, H <sub>2</sub> L, Ni(II)L.2ClO <sub>4</sub> , Cu(II)L.2ClO <sub>4</sub> , NaY, Ni(II)L-Y and Cu(II)L-Y                       | 5-8     |
| S13(a-d) | XPS patterns (survey image) of the (a) Ni(II)L.2ClO <sub>4</sub> (b) Ni(II)L-Y (c) Cu(II)L.2ClO <sub>4</sub> and (d) Cu(II)L-Y                        | 09      |
| S14(a-d) | M(II)(2P <sub>3/2</sub> ) patterns of the (a) Ni(II)L.2ClO <sub>4</sub> (b) Ni(II)L-Y (c) Cu(II)L.2ClO <sub>4</sub> and (d) Cu(II)L-Y                 | 09      |
| S15(a-e) | Deconvoluted XPS of the N <sub>1s</sub> region for H <sub>2</sub> L, Ni(II)L.2ClO <sub>4</sub> , Cu(II)L.2ClO <sub>4</sub> , Ni(II)L-Y and Cu(II)L-Y. | 10      |
| S16(a-e) | Deconvoluted XPS of the O <sub>1s</sub> region for H <sub>2</sub> L, Ni(II)L.2ClO <sub>4</sub> , Cu(II)L.2ClO <sub>4</sub> , Ni(II)L-Y and Cu(II)L-Y. | 11      |
| S17(a-c) | N <sub>2</sub> isotherms of a) NaY, (b) Ni(II)L-Y and (c) Cu(II)L-Y (filled loops are absorption and unfilled loops are desorption).                  | 12      |
| S18      | SEM-EDAX of the Ni(II)L-Y                                                                                                                             | 13      |
| S19      | SEM-EDAX of the Cu(II)L-Y                                                                                                                             | 13      |
| S20      | Image mapping studies of the Ni(II)L-Y                                                                                                                | 14      |

|            |                                                                                                                                                                                                                                                        |           |
|------------|--------------------------------------------------------------------------------------------------------------------------------------------------------------------------------------------------------------------------------------------------------|-----------|
| <b>S21</b> | Image mapping studies of the Cu(II)L-Y                                                                                                                                                                                                                 | <b>15</b> |
| <b>S22</b> | TEM-EDAX of the Ni(II)L-Y                                                                                                                                                                                                                              | <b>16</b> |
| <b>S23</b> | TEM-EDAX of the Cu(II)L-Y                                                                                                                                                                                                                              | <b>16</b> |
| <b>S24</b> | Average particle size of the (a) NaY, (b) Ni(II)L-Y and (c) Cu(II)L-Y                                                                                                                                                                                  | <b>17</b> |
| <b>S25</b> | The absorbance changes of the (a) Ni(II)L.2ClO <sub>4</sub> and (b) Cu(II)L.2ClO <sub>4</sub> in presence of hydrogen peroxide at 0 °C.                                                                                                                | <b>17</b> |
| <b>S26</b> | The absorption plots for benzhydrol oxidation (a) NaY, (b) Ni(II)L.2ClO <sub>4</sub> , (c) Cu(II)L.2ClO <sub>4</sub> , (d) Ni(II)L-Y and (e)Cu(II)L-Y.                                                                                                 | <b>18</b> |
| <b>S27</b> | The absorption plots showing the photo degradation of RhB in the presence of (a) NaY, (b) Ni(II)L-Y, (c) Cu(II)L-Y, (d)Ni(II)L.2ClO <sub>4</sub> and (e)Cu(II)L.2ClO <sub>4</sub> under UV irradiation                                                 | <b>19</b> |
| <b>S28</b> | The absorption plots showing the photo degradation of RhB in the presence of (f) NaY, (g) Ni(II)L-Y, (h) Cu(II)L-Y, (i) Ni(II)L.2ClO <sub>4</sub> and (j) Cu(II)L.2ClO <sub>4</sub> with H <sub>2</sub> O <sub>2</sub> under Visible light irradiation | <b>20</b> |
| <b>S29</b> | LC-MS spectra of the benzhydrol oxidation products encapsulated complexes                                                                                                                                                                              | <b>21</b> |
| <b>S30</b> | XRD: BH oxidation (a) Ni(II)L-Y and (b) Cu(II)L-Y(RECOVERED)                                                                                                                                                                                           | <b>21</b> |
| <b>S31</b> | XRD: RhB oxidation (a) Ni(II)L-Y and (b) Cu(II)L-Y(RECOVERED)                                                                                                                                                                                          | <b>22</b> |
| <b>S32</b> | DRS: BH oxidation (a)Ni(II)L-Y and (b) Cu(II)L-Y (RECOVERED)                                                                                                                                                                                           | <b>22</b> |
| <b>S33</b> | DRS:RhB oxidation H <sub>2</sub> O <sub>2</sub> (a)Ni(II)L-Y and (b) Cu(II)L-Y(RECOVERED)                                                                                                                                                              | <b>23</b> |
| <b>S34</b> | <sup>1</sup> H NMR spectral data of SAL                                                                                                                                                                                                                | <b>24</b> |
| <b>S35</b> | <sup>13</sup> C NMR spectral data of SAL                                                                                                                                                                                                               | <b>25</b> |
| <b>S36</b> | Proposed mechanism for the RhB degradation                                                                                                                                                                                                             | <b>26</b> |
|            | Table A & B: percentage of Ni(II), Cu(II), Si and Al                                                                                                                                                                                                   | <b>27</b> |

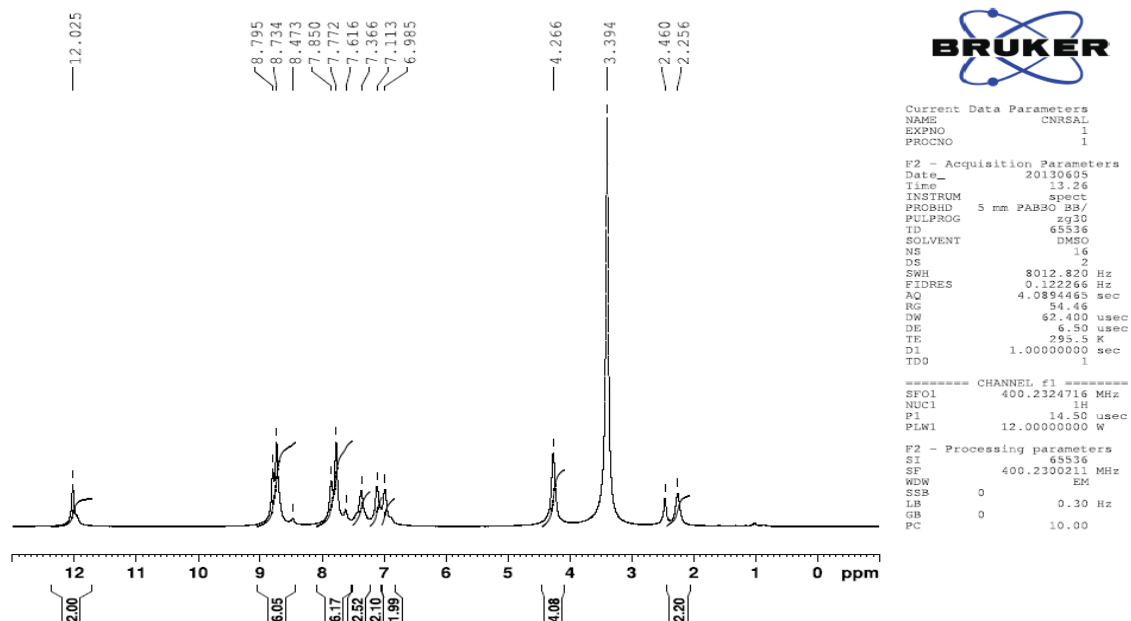

Figure .S1: <sup>1</sup>H spectra of H<sub>2</sub>L

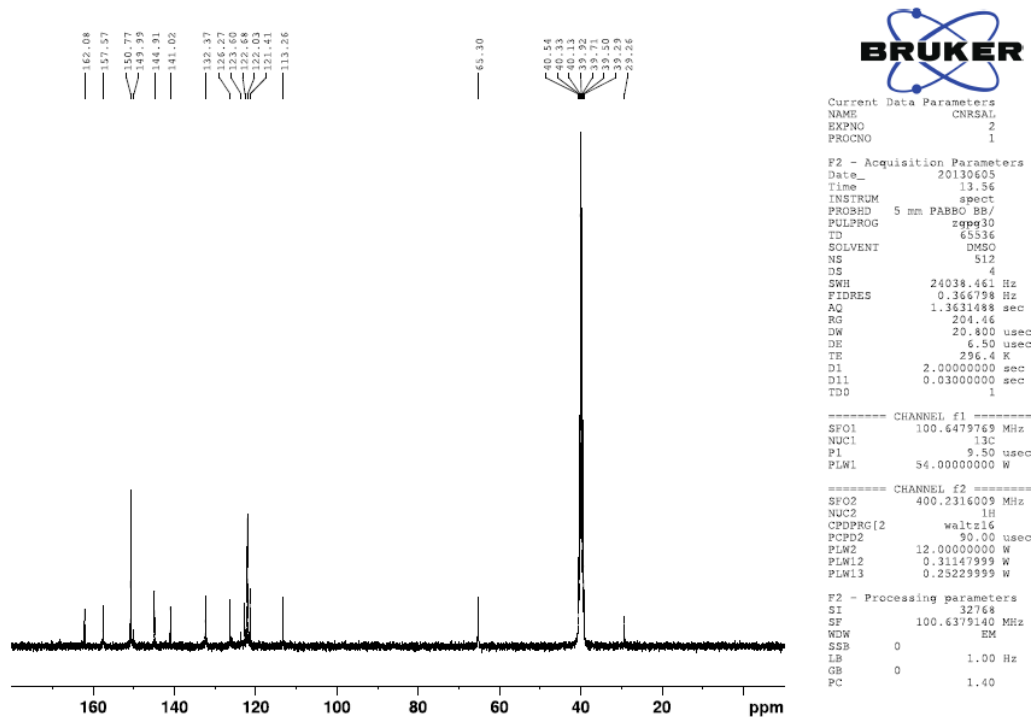

Figure .S2: <sup>13</sup>C-NMR spectra of H<sub>2</sub>L.

D:\2013\ORGANIC LAB\ARRENDRAIR1  
ORGANIC LAB

6/21/2013 2:40:38 PM

R1

R1 #8-24 RT: 0.12-0.38 AV: 17 NL: 5.63E6  
T: + p ESI Full ms [100.00-1000.00]

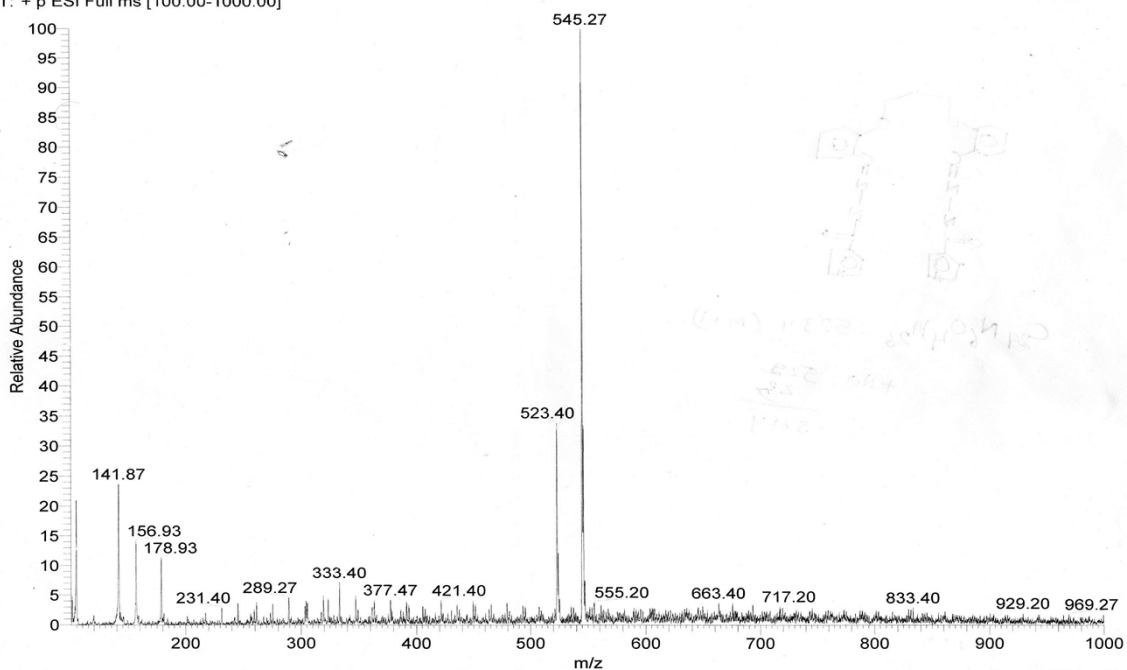

Figure S3:ESI-mass spectra of H<sub>2</sub>L

D:\2013\ORGANIC LAB\ARRENDRA\CNR-NI  
ORGANIC LAB

7/11/2013 4:23:59 PM

CNR-NI

CNR-NI #8-22 RT: 0.13-0.35 AV: 15 NL: 1.50E6  
T: + p ESI Full ms [100.00-1000.00]

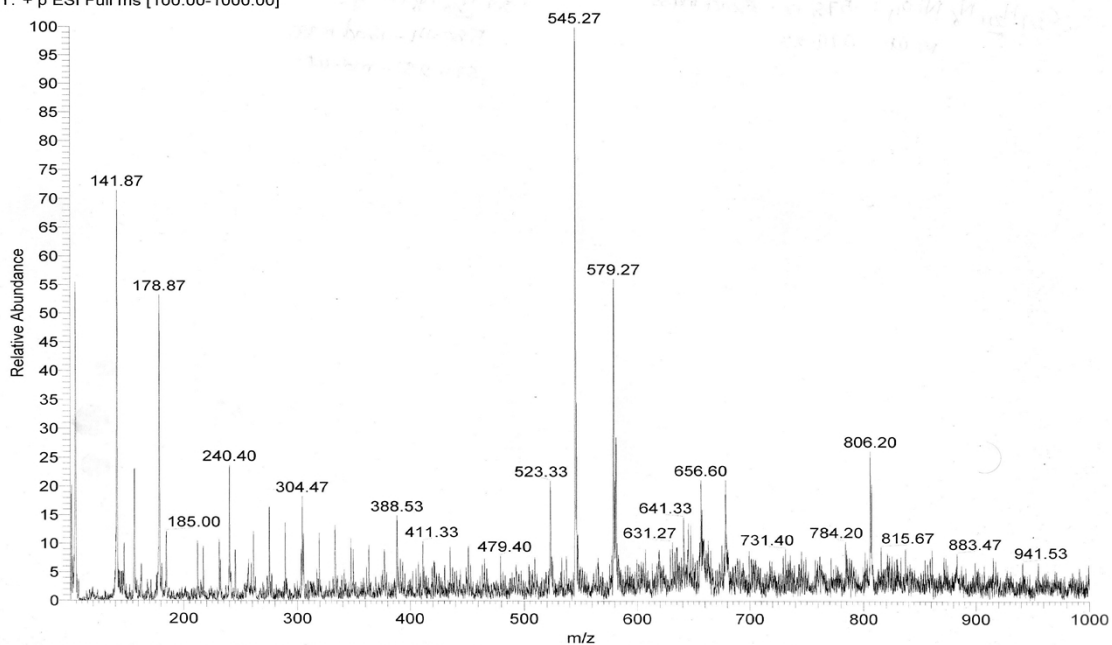

Figure S4:ESI-mass spectra of Ni(II)L.2ClO<sub>4</sub>

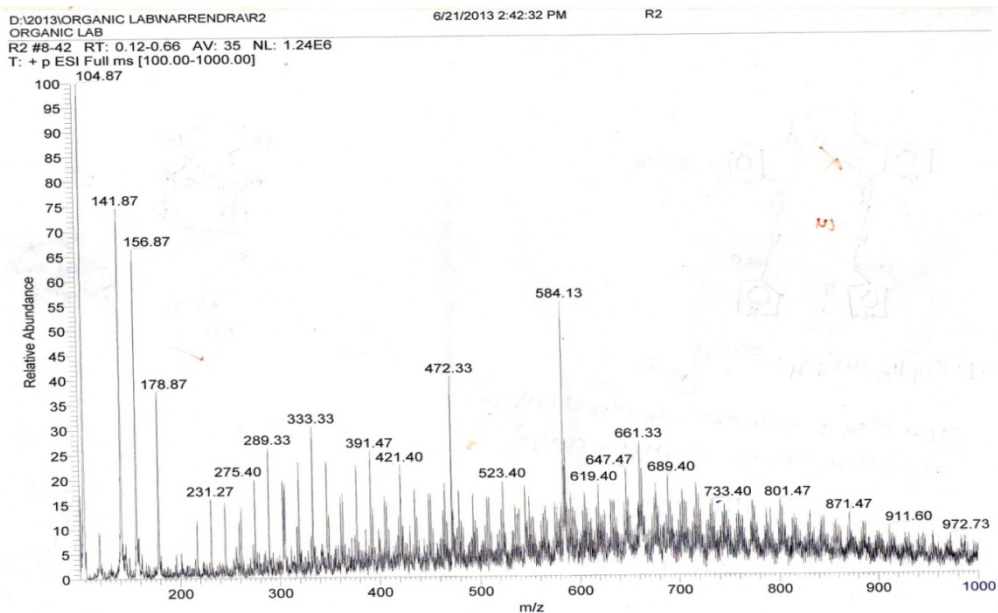

Figure S5: ESI-mass spectra of  $\text{Cu(II)L.2ClO}_4$

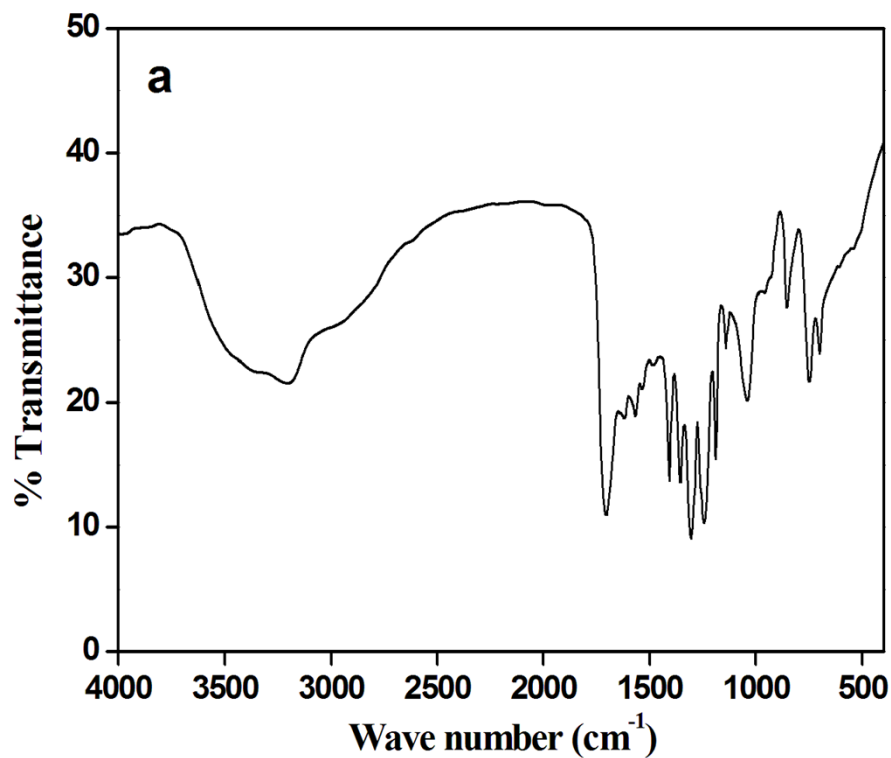

Figure S6: FTIR spectra of the SAL

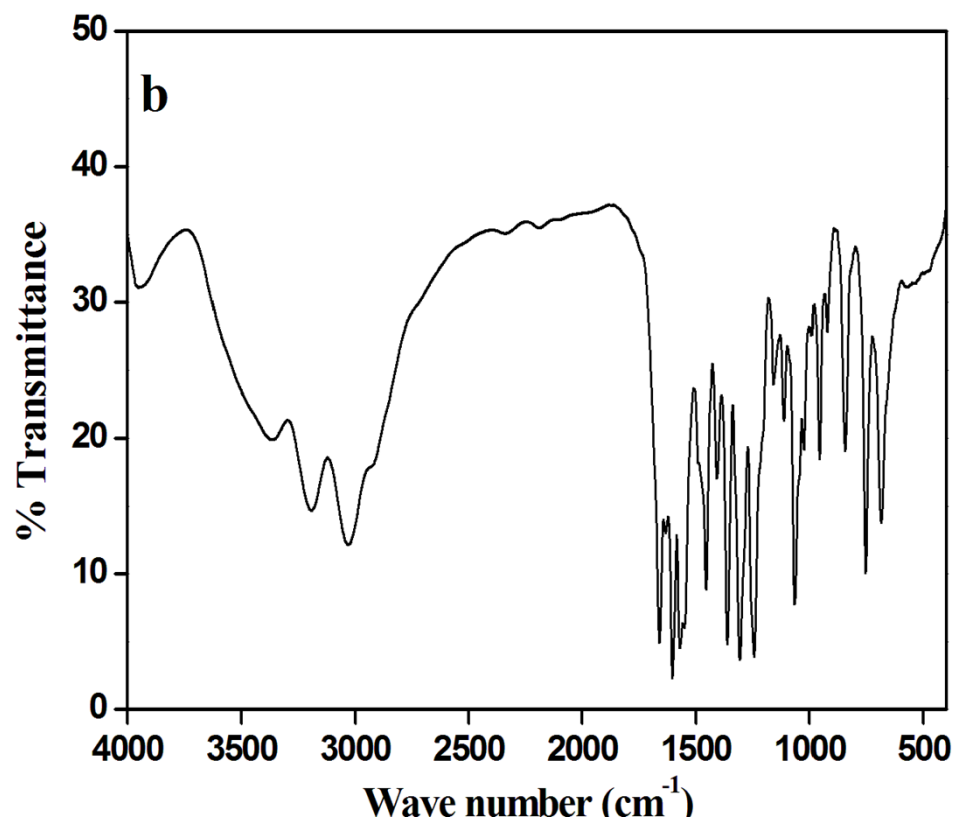

Figure S7: FTIR spectra of the H<sub>2</sub>L

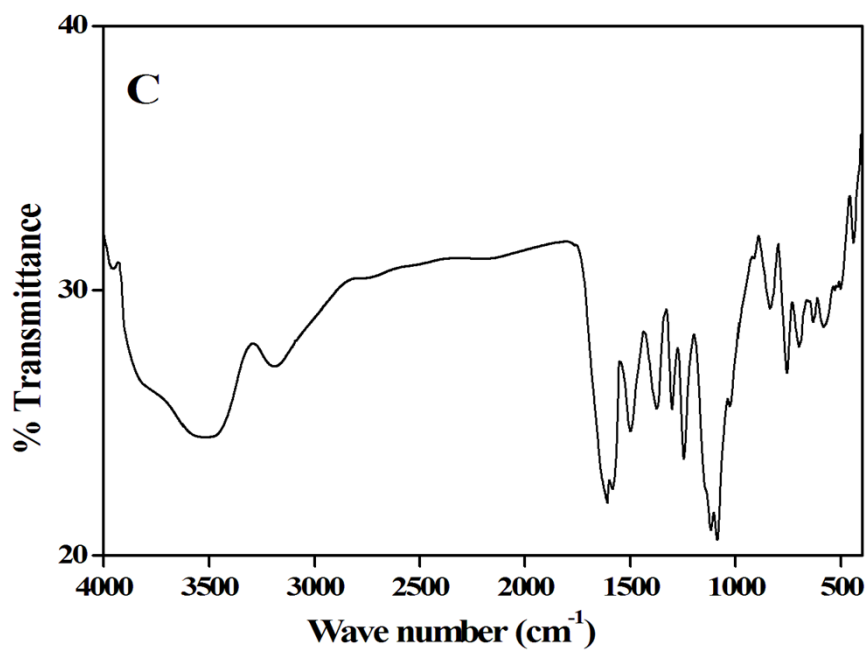

Figure S8: FTIR spectra of the Ni(II)L.2ClO<sub>4</sub>

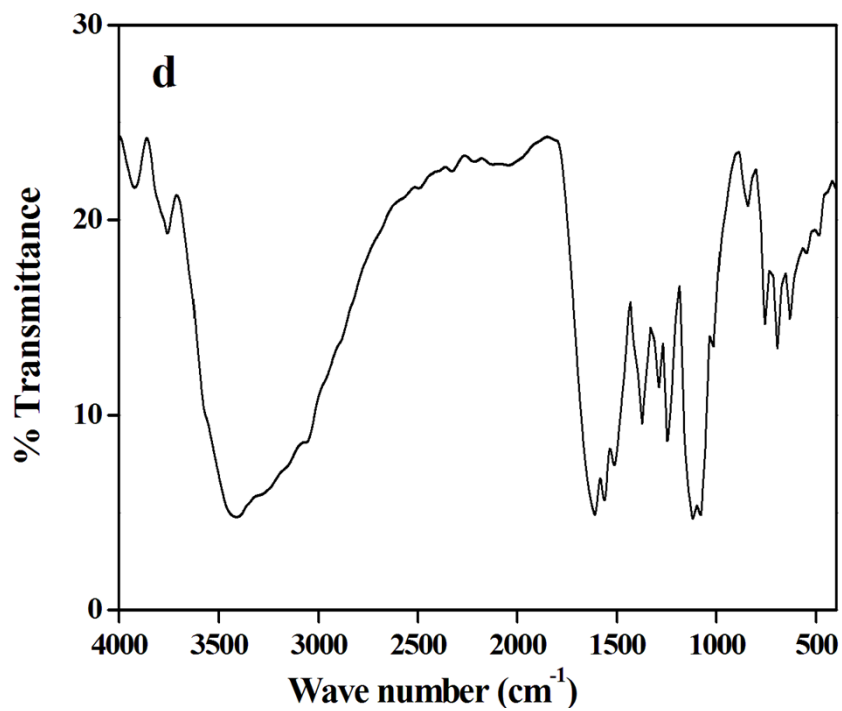

Figure S9: FTIR spectra of Cu(II)L.2ClO<sub>4</sub>

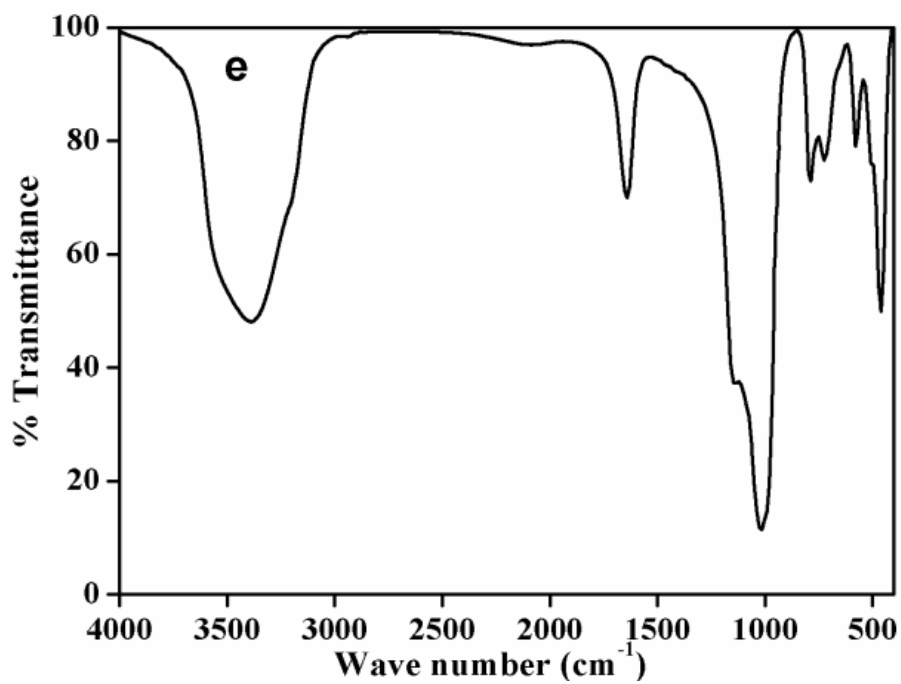

Figure S10: FTIR spectra of the Na-Y

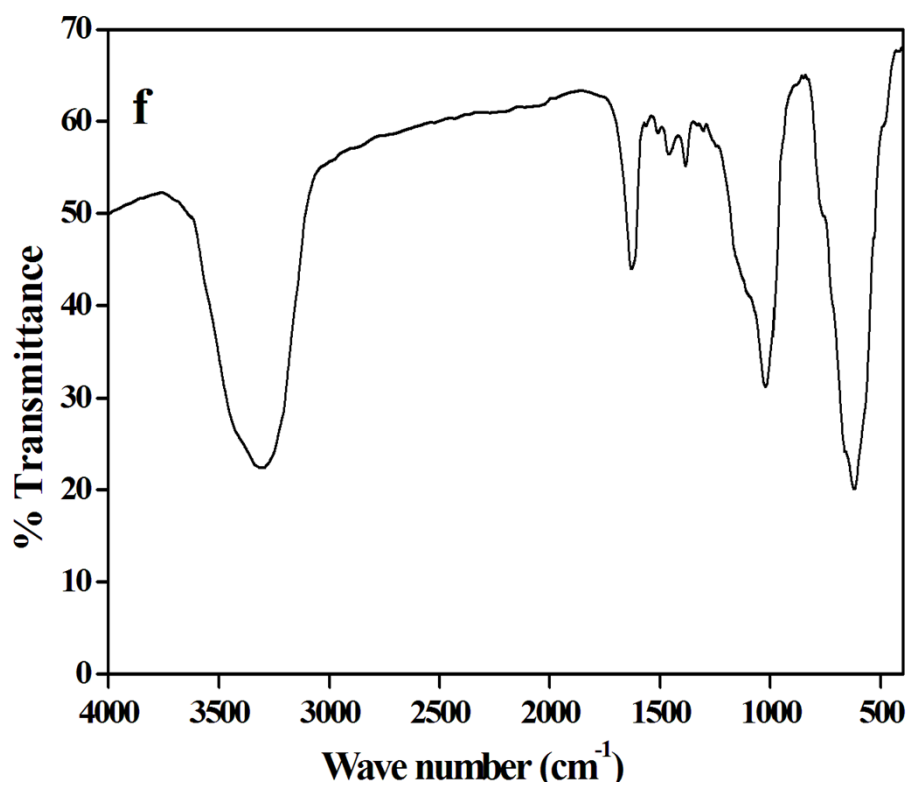

Figure S11: FTIR spectra of the Ni(II)L-Y

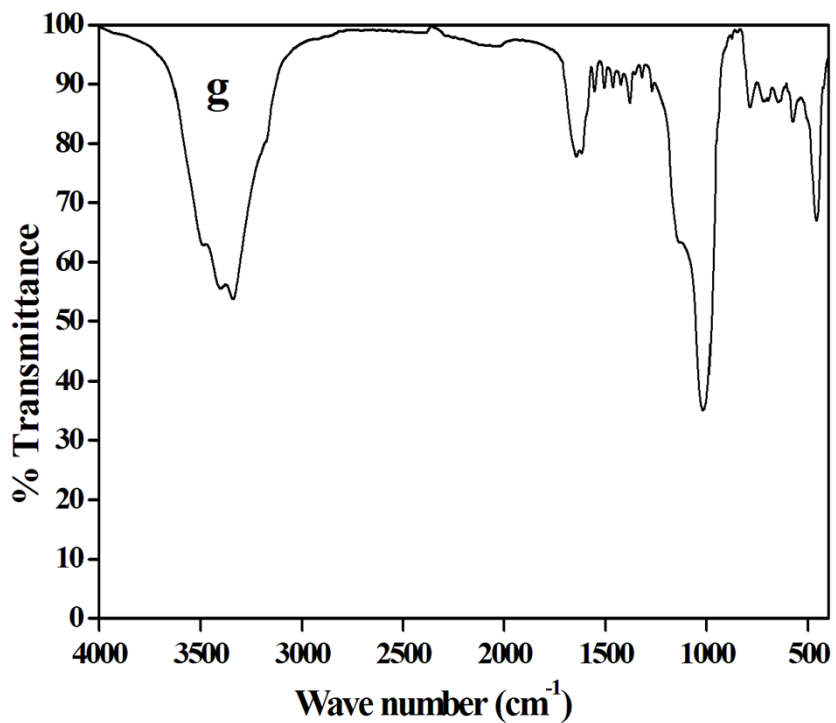

Figure S12: FTIR spectra of the Cu(II)L-Y



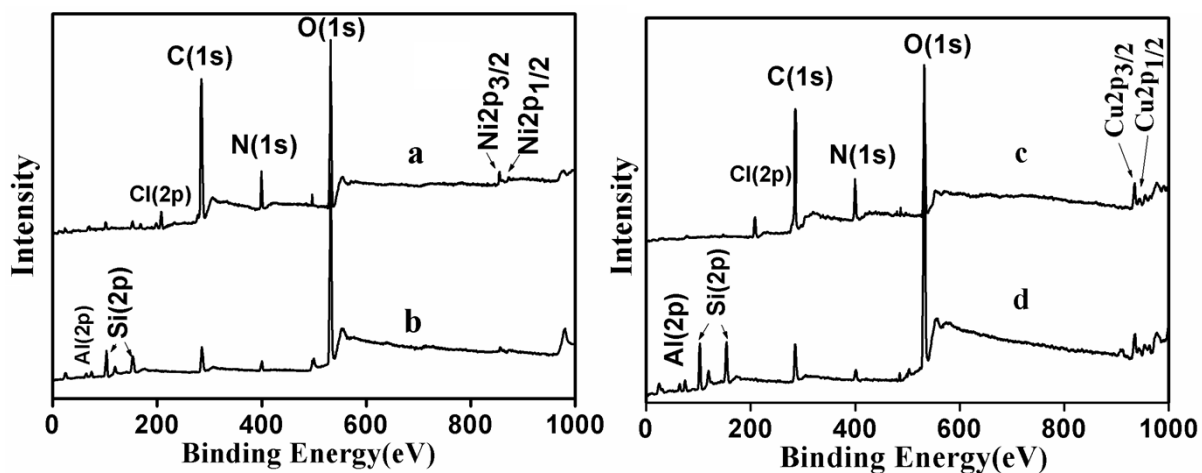

**Figure S13:(a-d):** XPS patterns (survey image) of the (a) Ni(II)L.2ClO<sub>4</sub> (b) Ni(II)L-Y (c) Cu(II)L.2ClO<sub>4</sub> and (d) Cu(II)L-Y

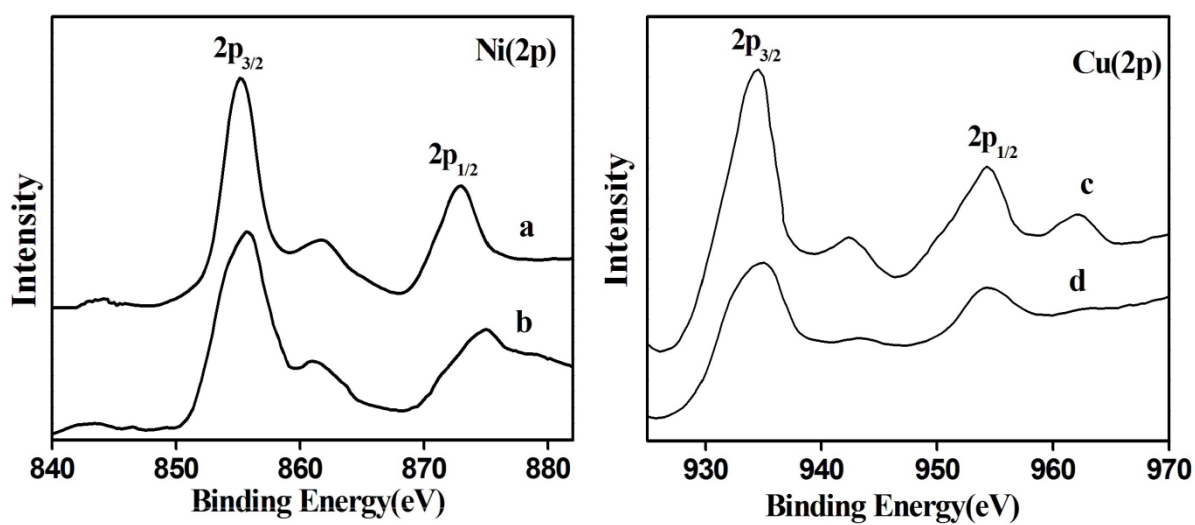

**Figure.S14(a-d):**M(II)(2P<sub>3/2</sub>) patterns of the (a) Ni(II)L.2ClO<sub>4</sub> (b) Ni(II)L-Y (c) Cu(II)L.2ClO<sub>4</sub> and (d) Cu(II)L-Y

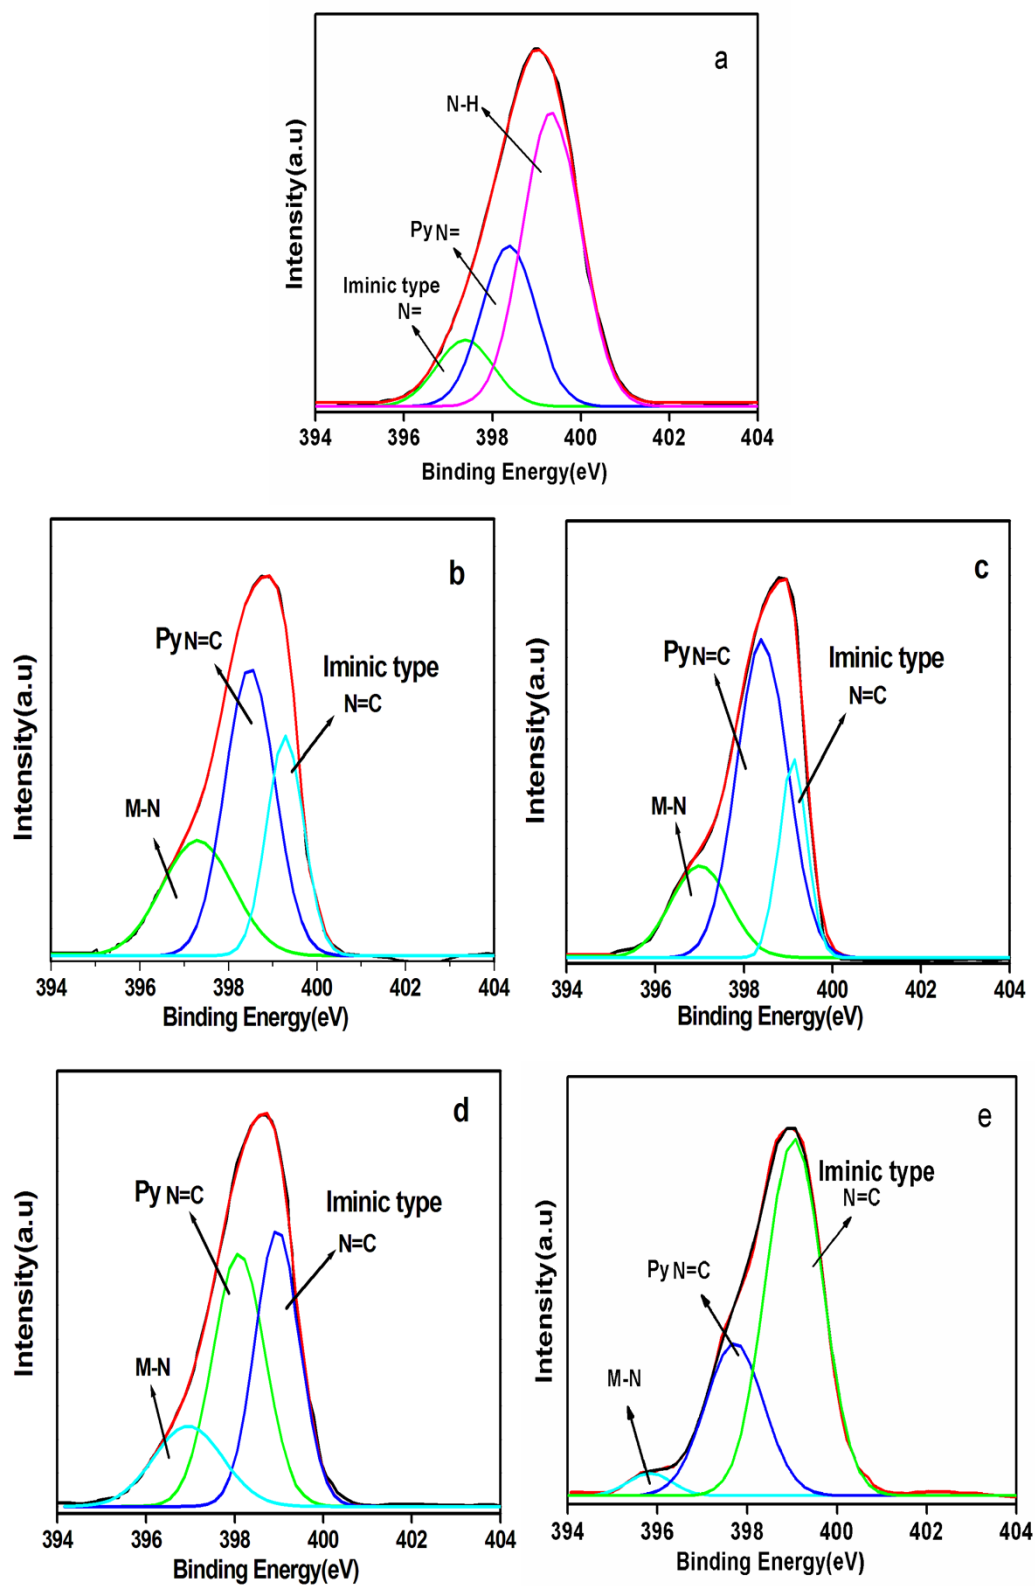

**Figure.S15(a-e):**Deconvoluted XPS of the N<sub>1s</sub> region for H<sub>2</sub>L, Ni(II)L.2CLO<sub>4</sub>, Cu(II)L.2CLO<sub>4</sub>, Ni(II)L-Y and Cu(II)L-Y.

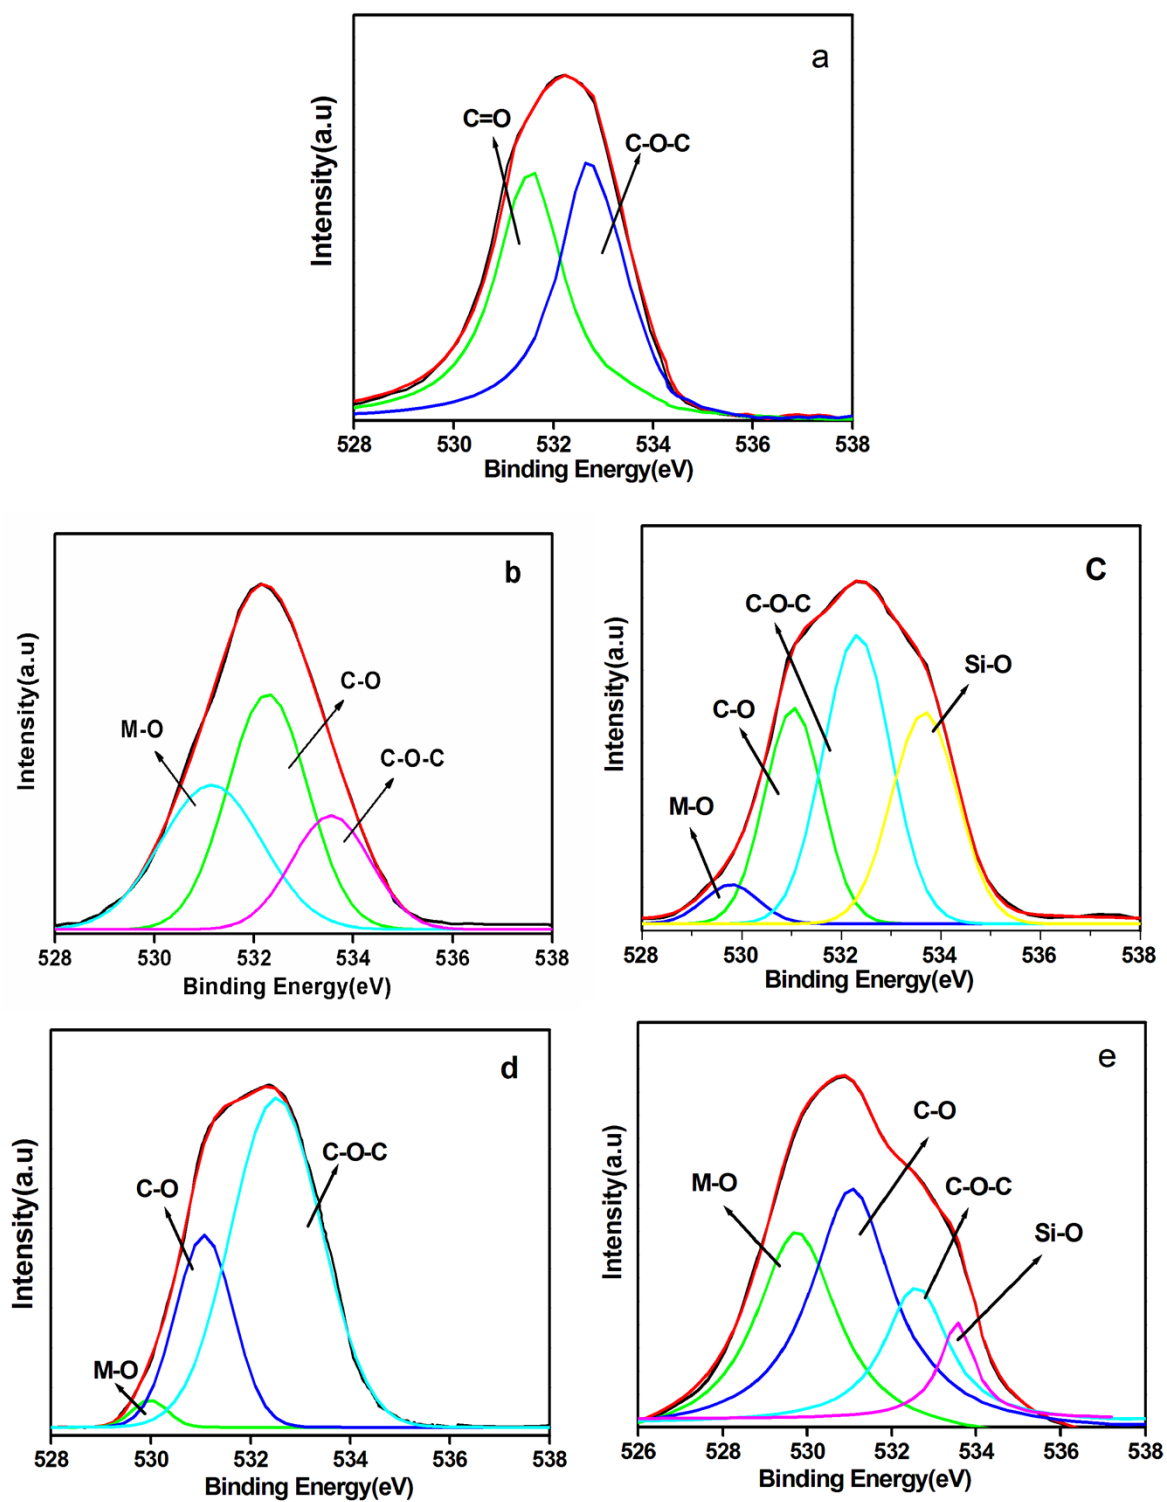

**Figure:S16(a-e)** Deconvoluted XPS of the O<sub>1s</sub> region for H<sub>2</sub>L, Ni(II)L.2CLO<sub>4</sub>, Cu(II)L.2CLO<sub>4</sub>, Ni(II)L-Y and Cu(II)L-Y.

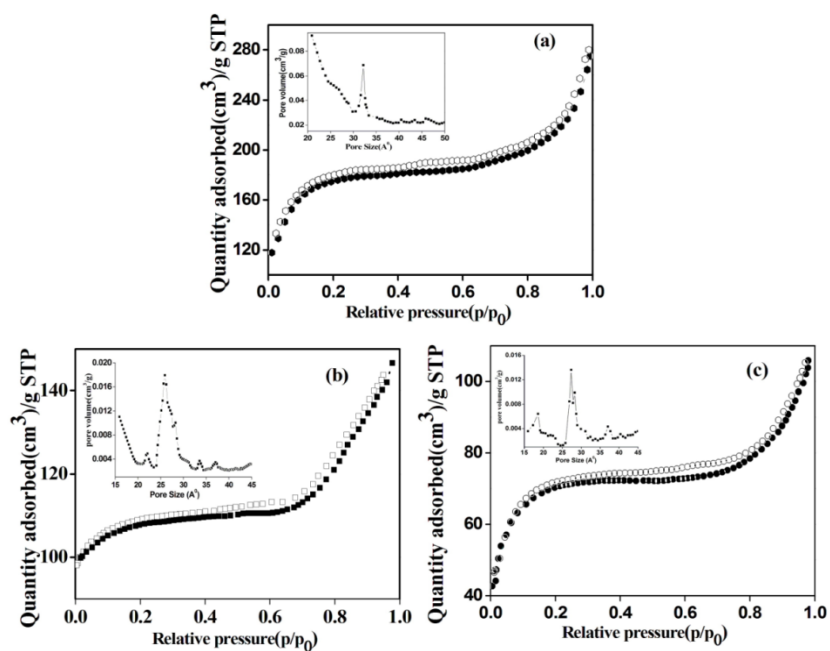

**Figure: S17(a-c)** N<sub>2</sub> isotherms of a) NaY, (b) Ni(II)L-Y and (c) Cu(II)L-Y (filled loops are absorption and unfilled loops are desorption)

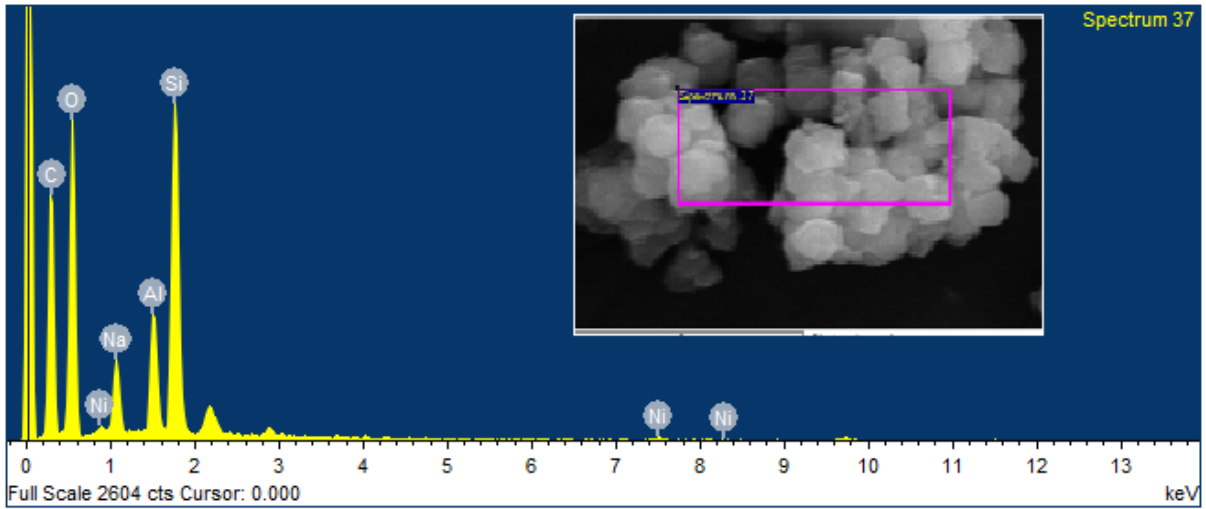

**Figure 18:** SEM-EDAX of the Ni(II)L-Y

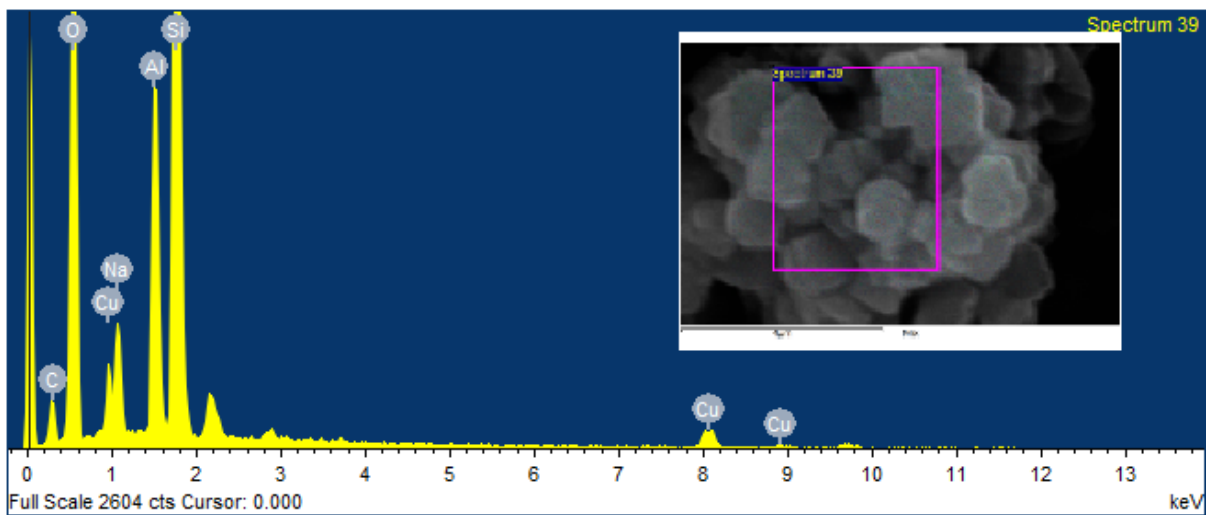

**Figure 19:** SEM

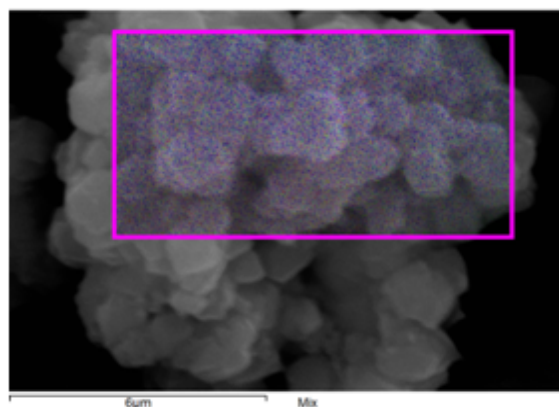

**EDAX of the Cu(II)L-Y**

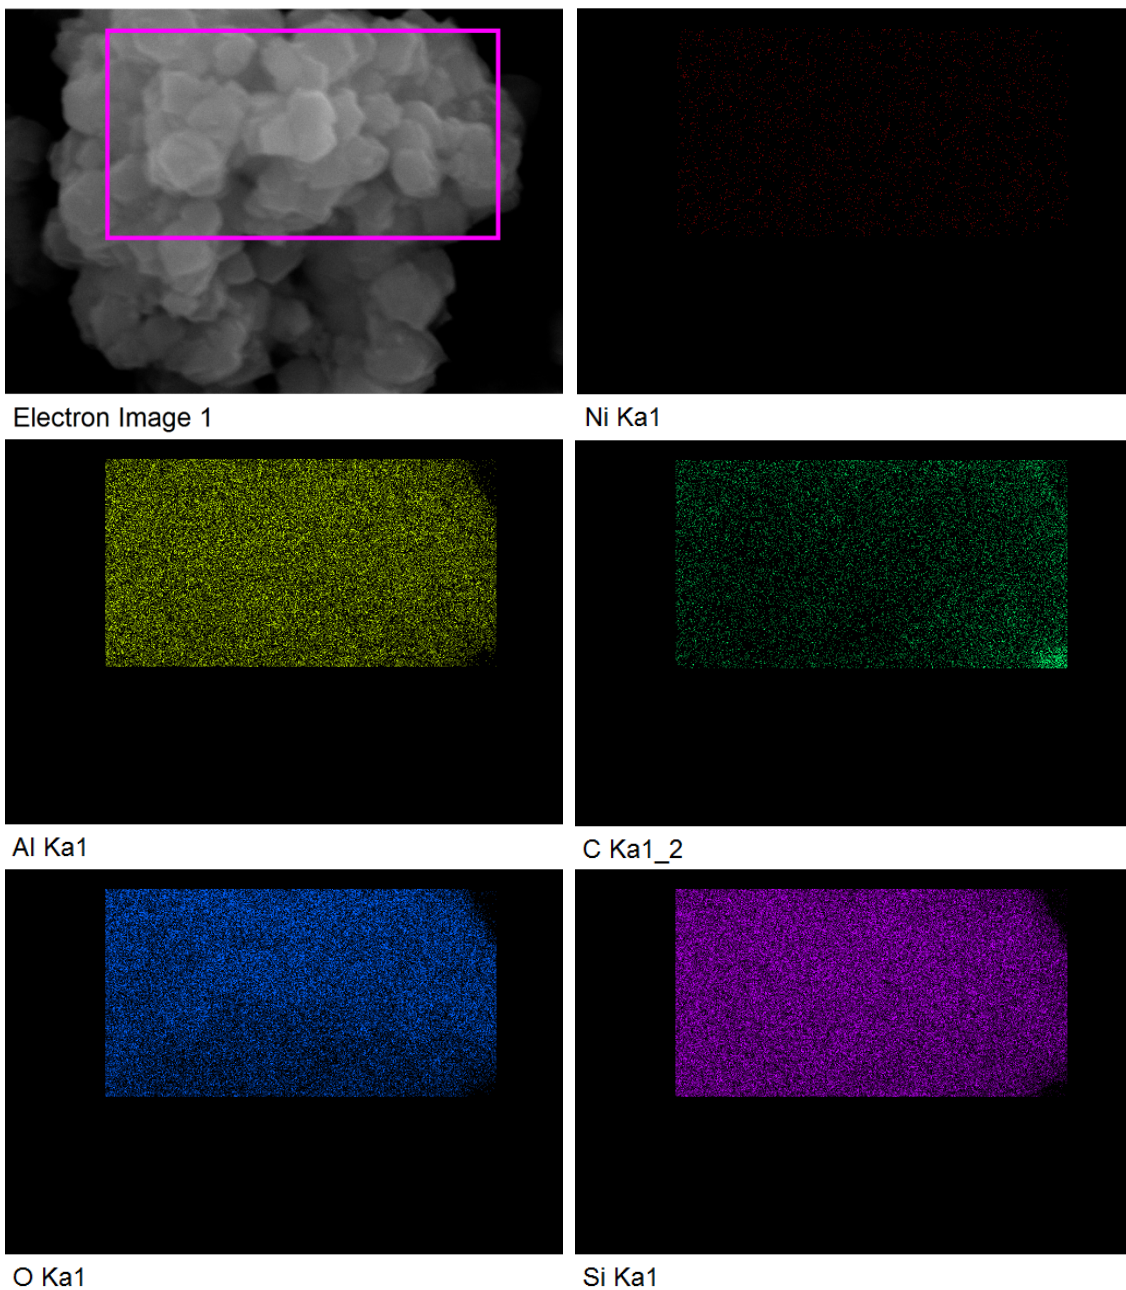

**Figure S20:**  
the Ni(II)L-Y

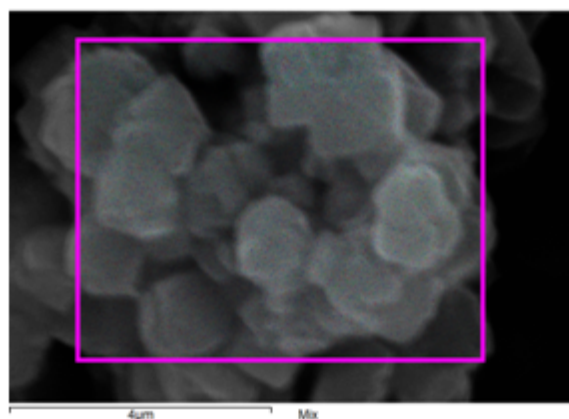

Image mapping studies of



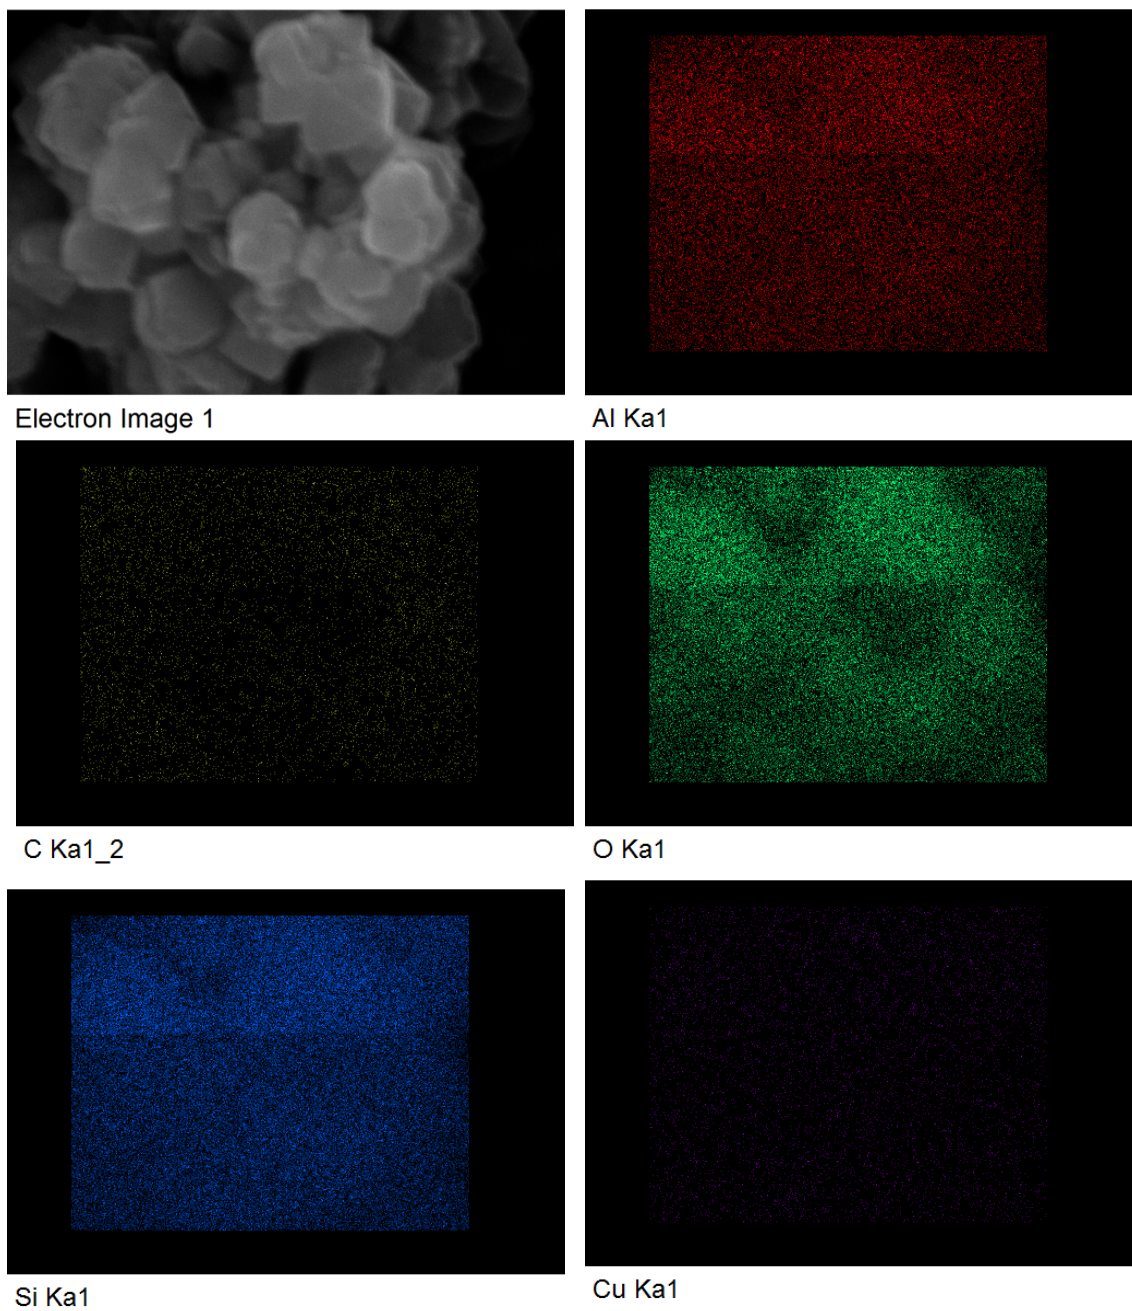

**Figure S21:** Image mapping studies of the Cu(II)L-Y

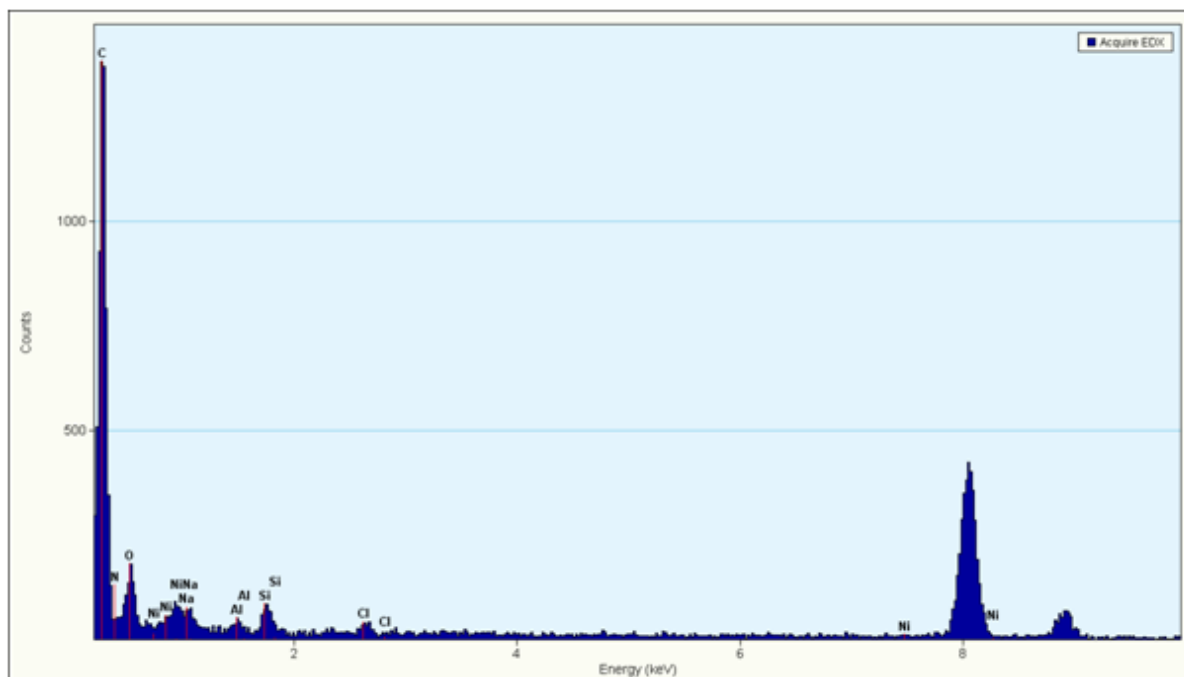

**Figure S22:** TEM-EDAX of the Ni(II)L-Y

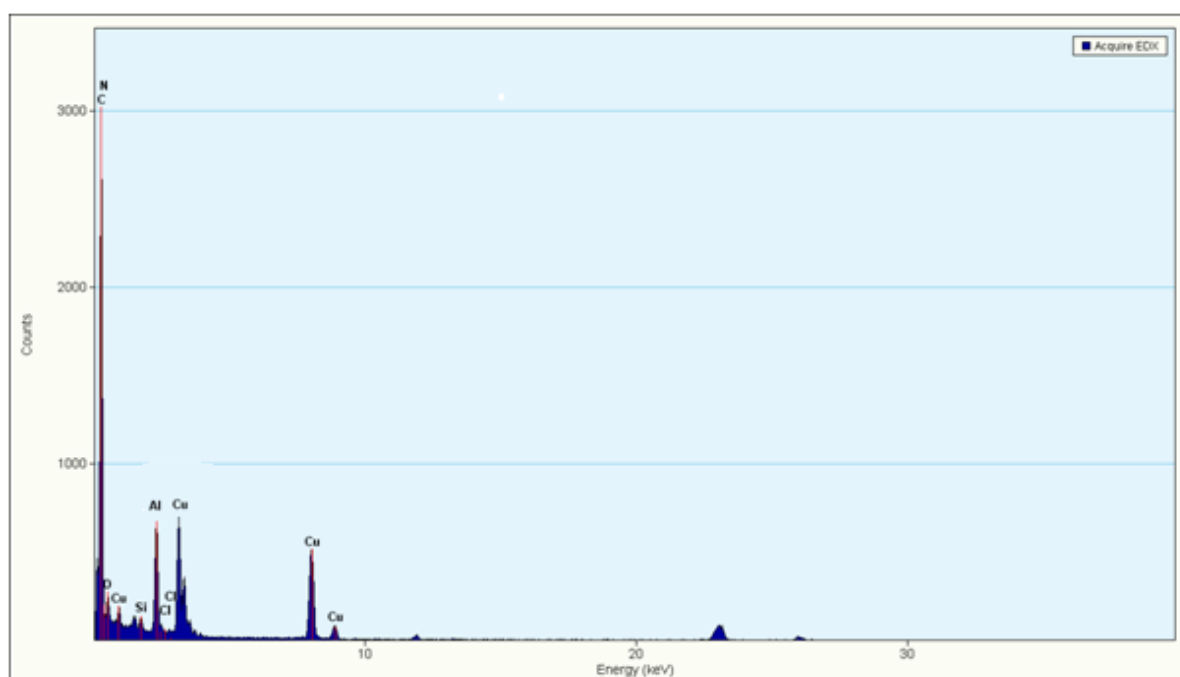

**Figure S23:** TEM-EDAX of the Cu(II)L-Y



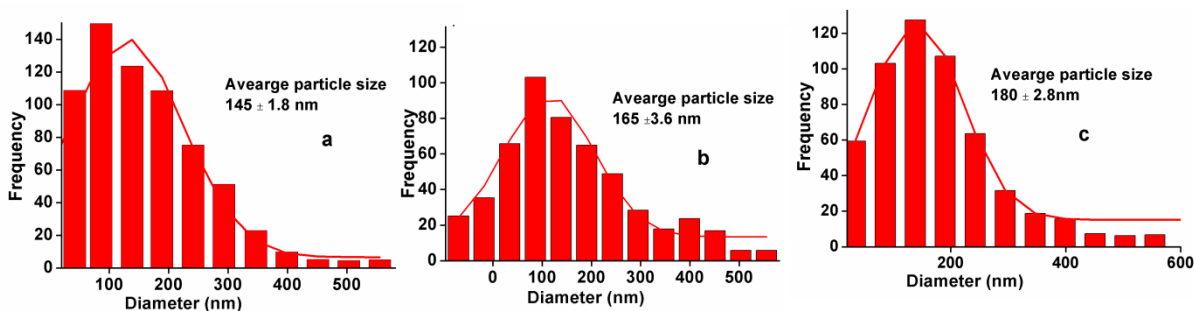

**Figure S24 (a-c):** The average particle size obtained from from the SEM micrograph analysis for a) NaY, b) Ni(II)L-Y and c) Cu (II)L-Y.

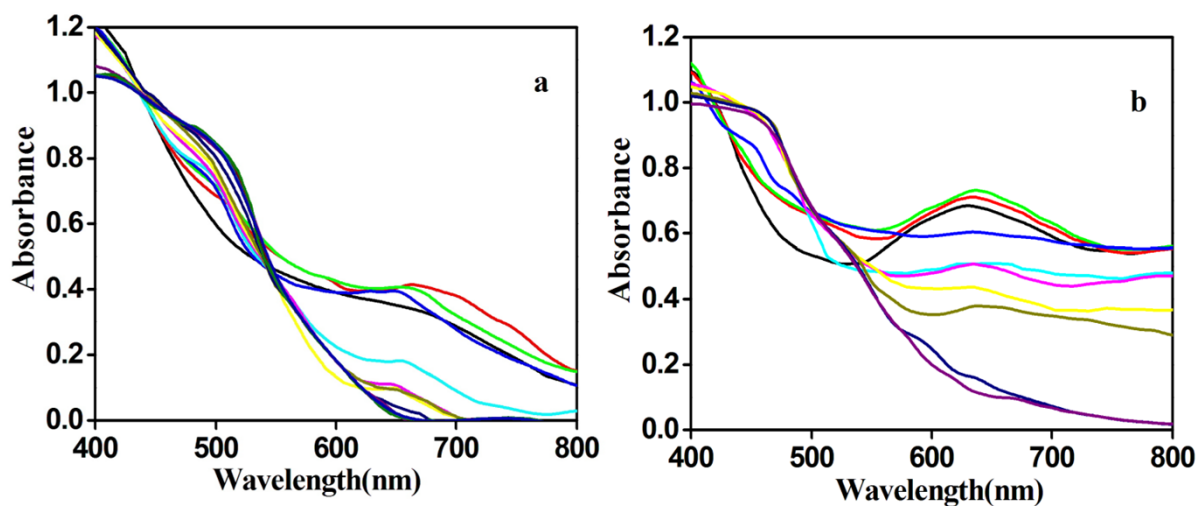

**Figure S25:**The absorption plots for benzhydrol oxidation (a) NaY, (b) Ni(II)L.2ClO<sub>4</sub>, (c) Cu(II)L.2ClO<sub>4</sub>, (d) Ni(II)L-Y and (e)Cu(II)L-Y.

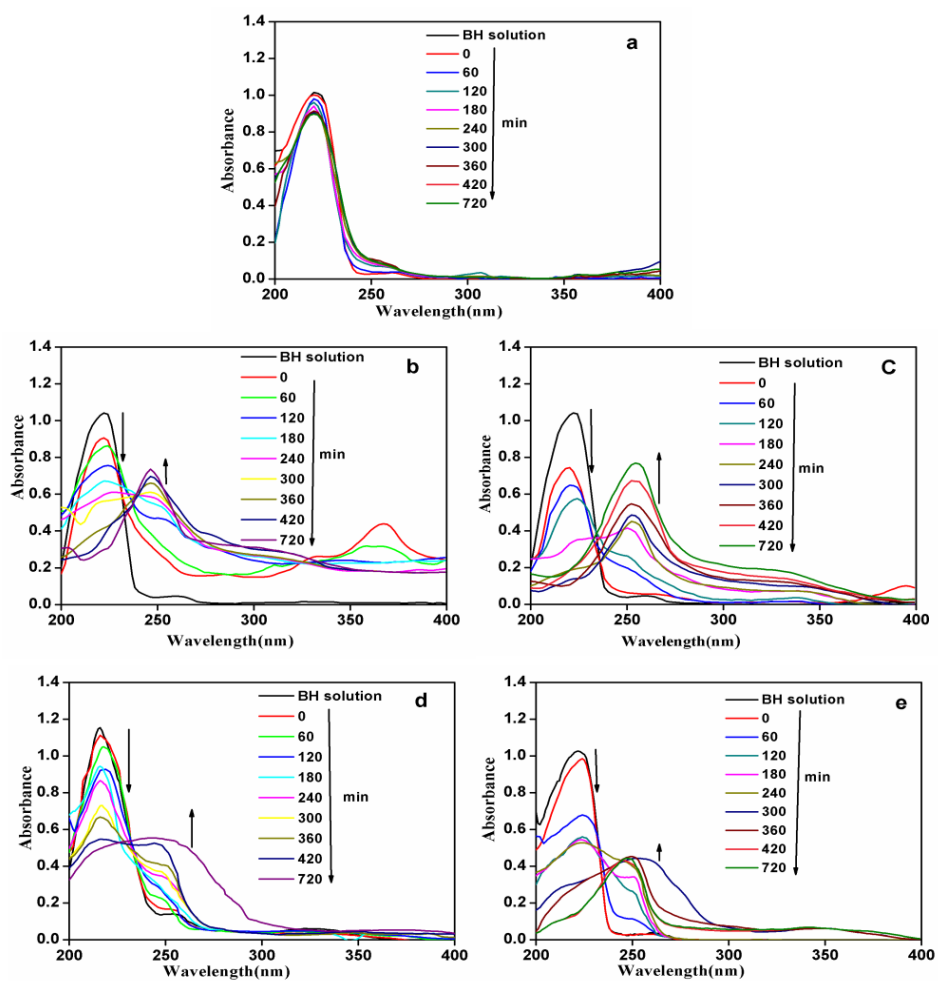

**Figure S26:** The absorption plots for benzhydrol oxidation (a) NaY, (b) Ni(II)L<sub>2</sub>ClO<sub>4</sub>, (c) Cu(II)L<sub>2</sub>ClO<sub>4</sub>, (d) Ni(II)L-Y and (e)Cu(II)L-Y.

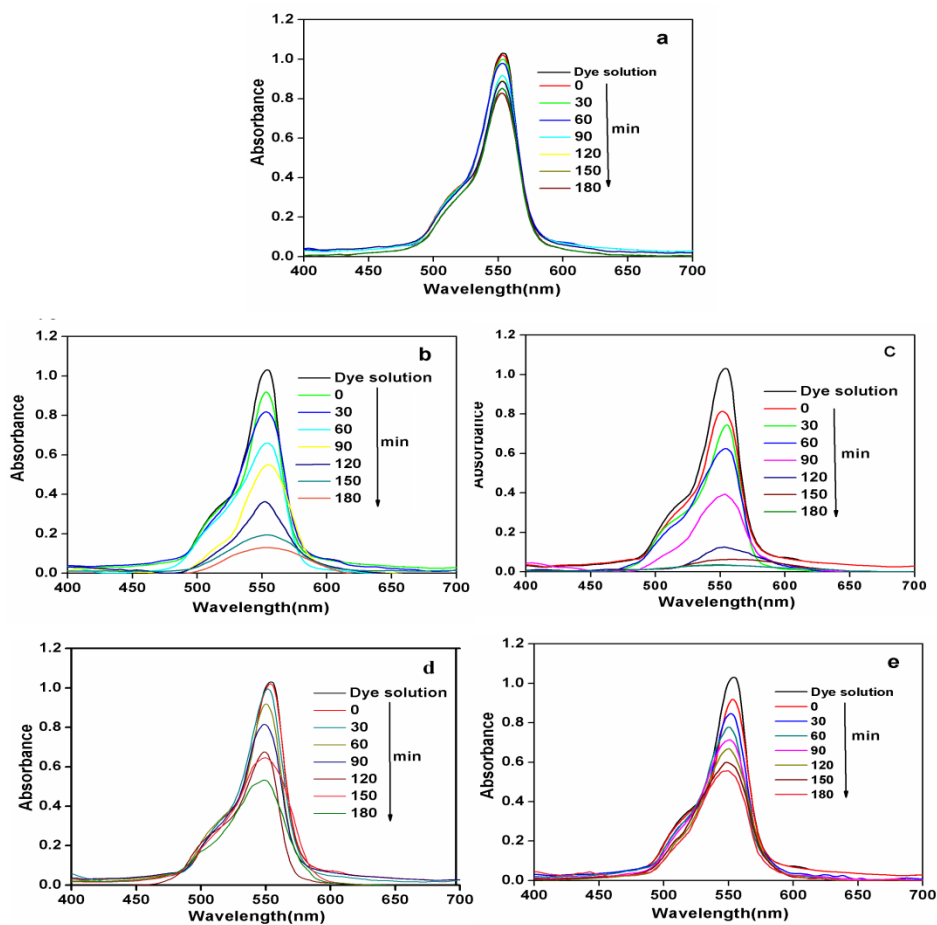

**Figure 27:**The absorption plots showing the photo degradation of RhB in the presence of (a) NaY, (b) Ni(II)L-Y, (c) Cu(II)L-Y, (d)Ni(II)L.2ClO<sub>4</sub> and (e)Cu(II)L.2ClO<sub>4</sub> under UV irradiation.

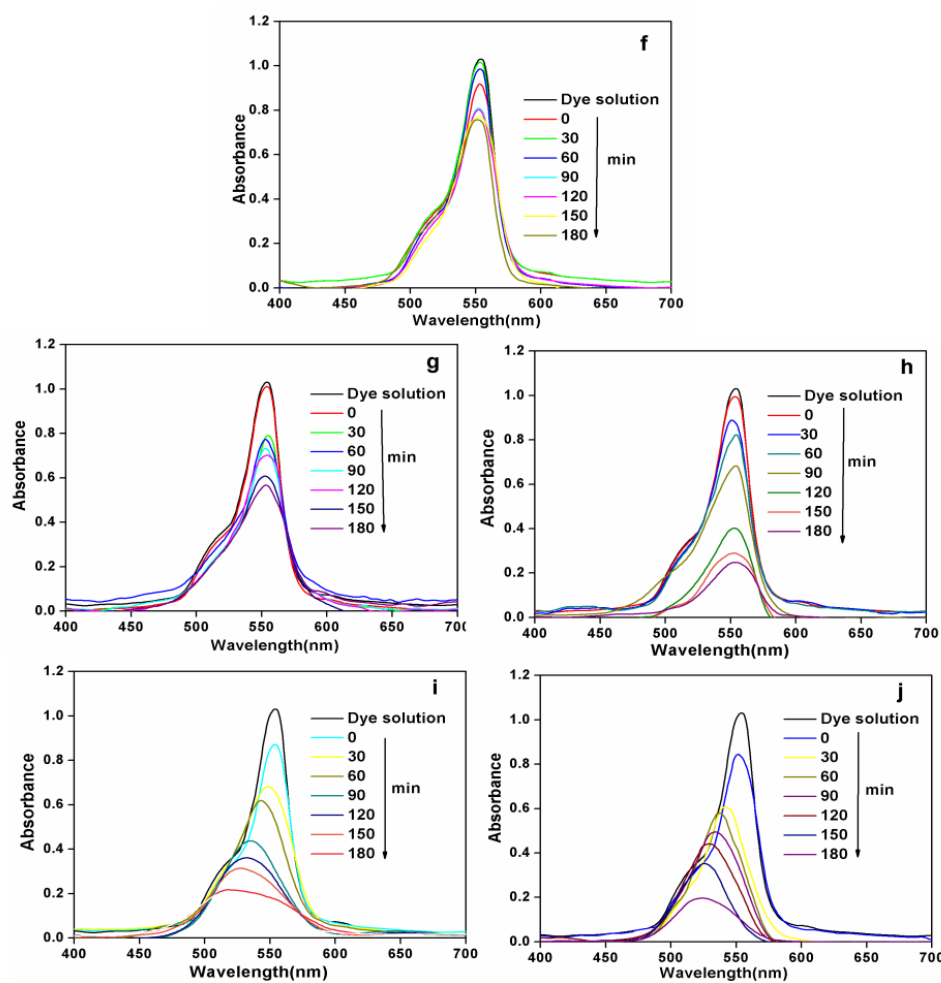

**Figure 29:** The absorption plots showing the photo degradation of RhB in the presence of (f) NaY, (g) Ni(II)L-Y, (h) Cu(II)L-Y, (i) Ni(II)L.2ClO<sub>4</sub> and (j) Cu(II)L.2ClO<sub>4</sub> under visible/H<sub>2</sub>O<sub>2</sub> irradiation.

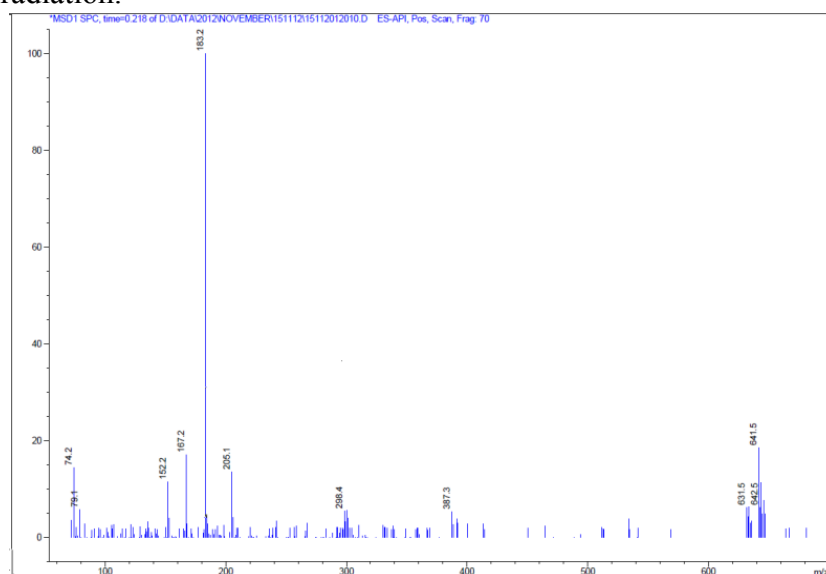

**Figure S29:** LC-MS spectra of the benzhydrol oxidation products encapsulated complexes

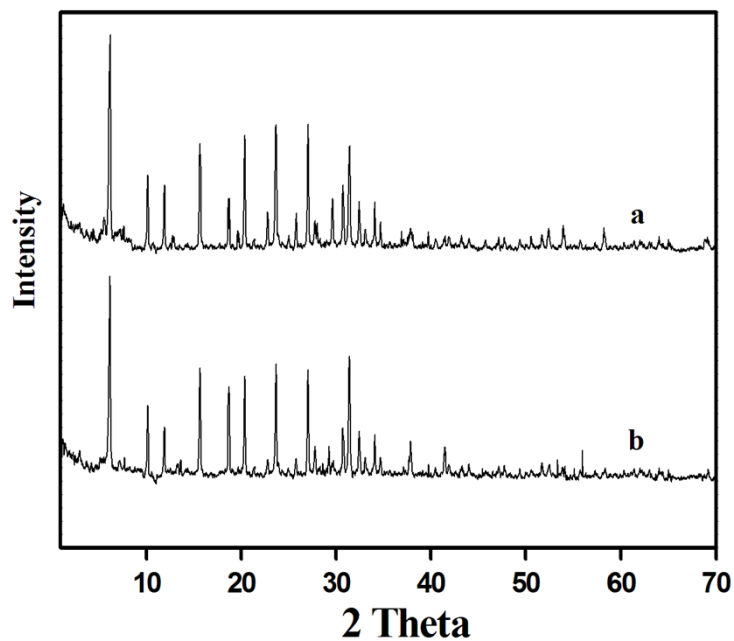

**Figure S30:** After reaction the recovered catalyst (a) Ni(II)L-Y and (b) Cu(II)L-Y in BH oxidation

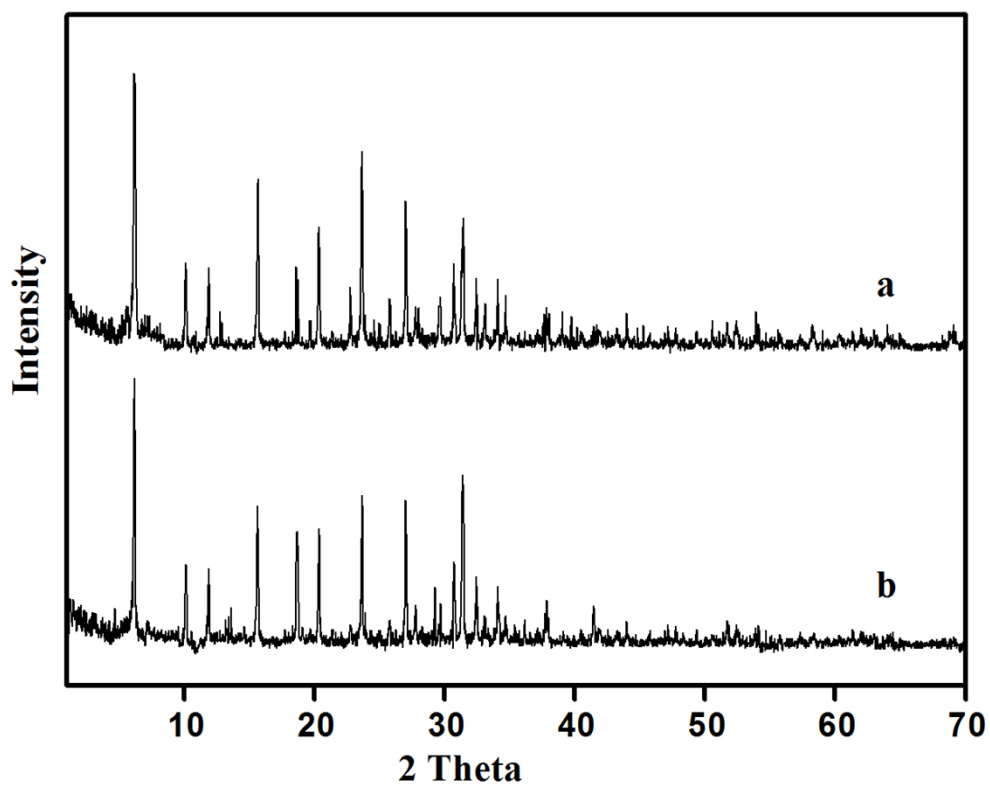

**Figure S31:** After reaction the recovered catalyst (a) Ni(II)L-Y and (b) Cu(II)L-Y in RhB degradation.

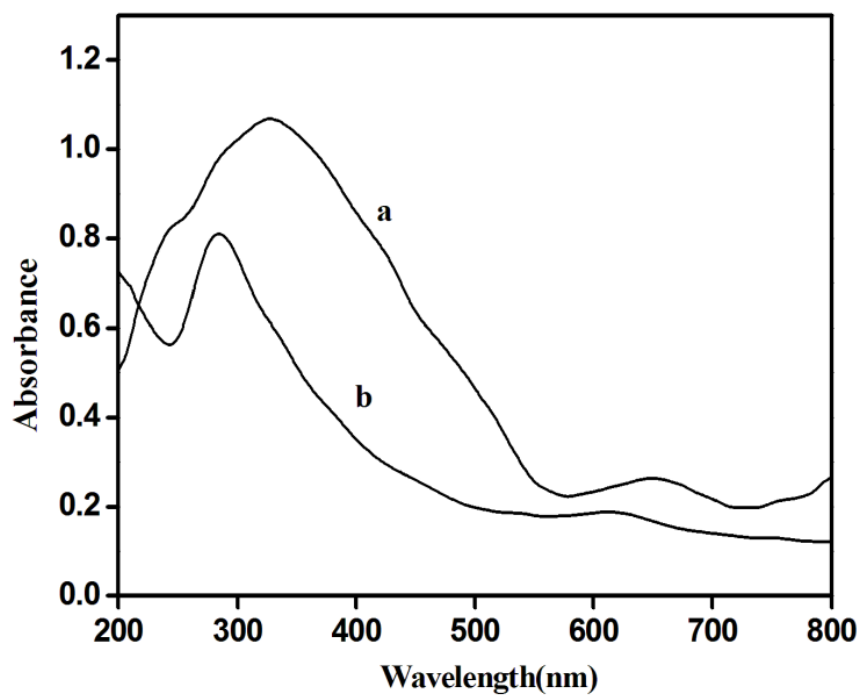

**Figure S32** : Rh B degradation (a)Ni(II)L-Y and (b) Cu(II)L-Y

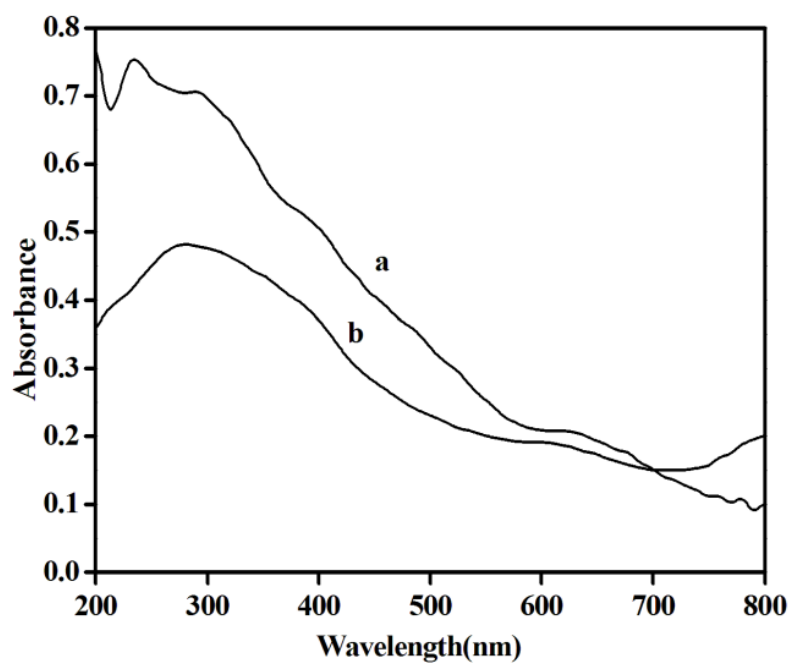

**Figure S33**: RhB oxidation  $H_2O_2$  (a)Ni(II)L-Y and (b) Cu(II)L-Y



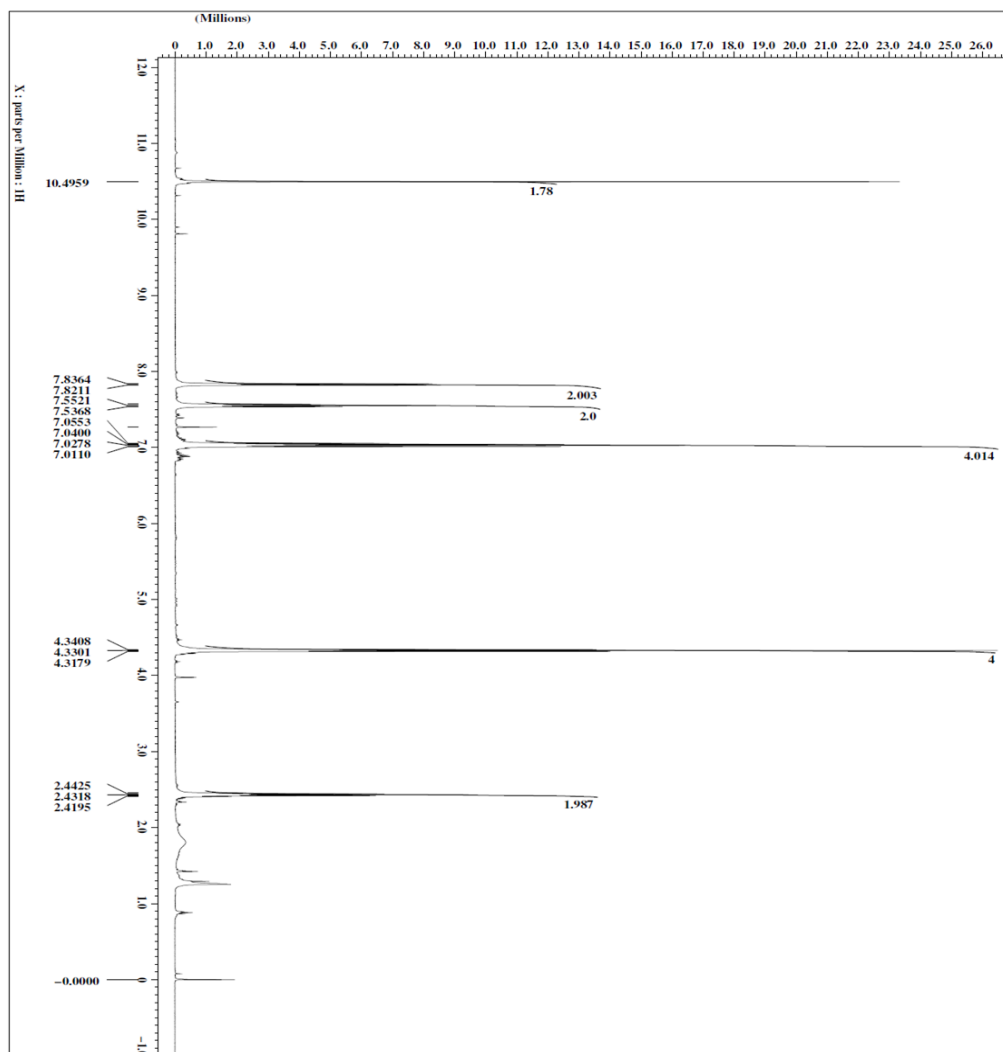

Figure S35:  $^1\text{H}$  NMR spectral data of SAL



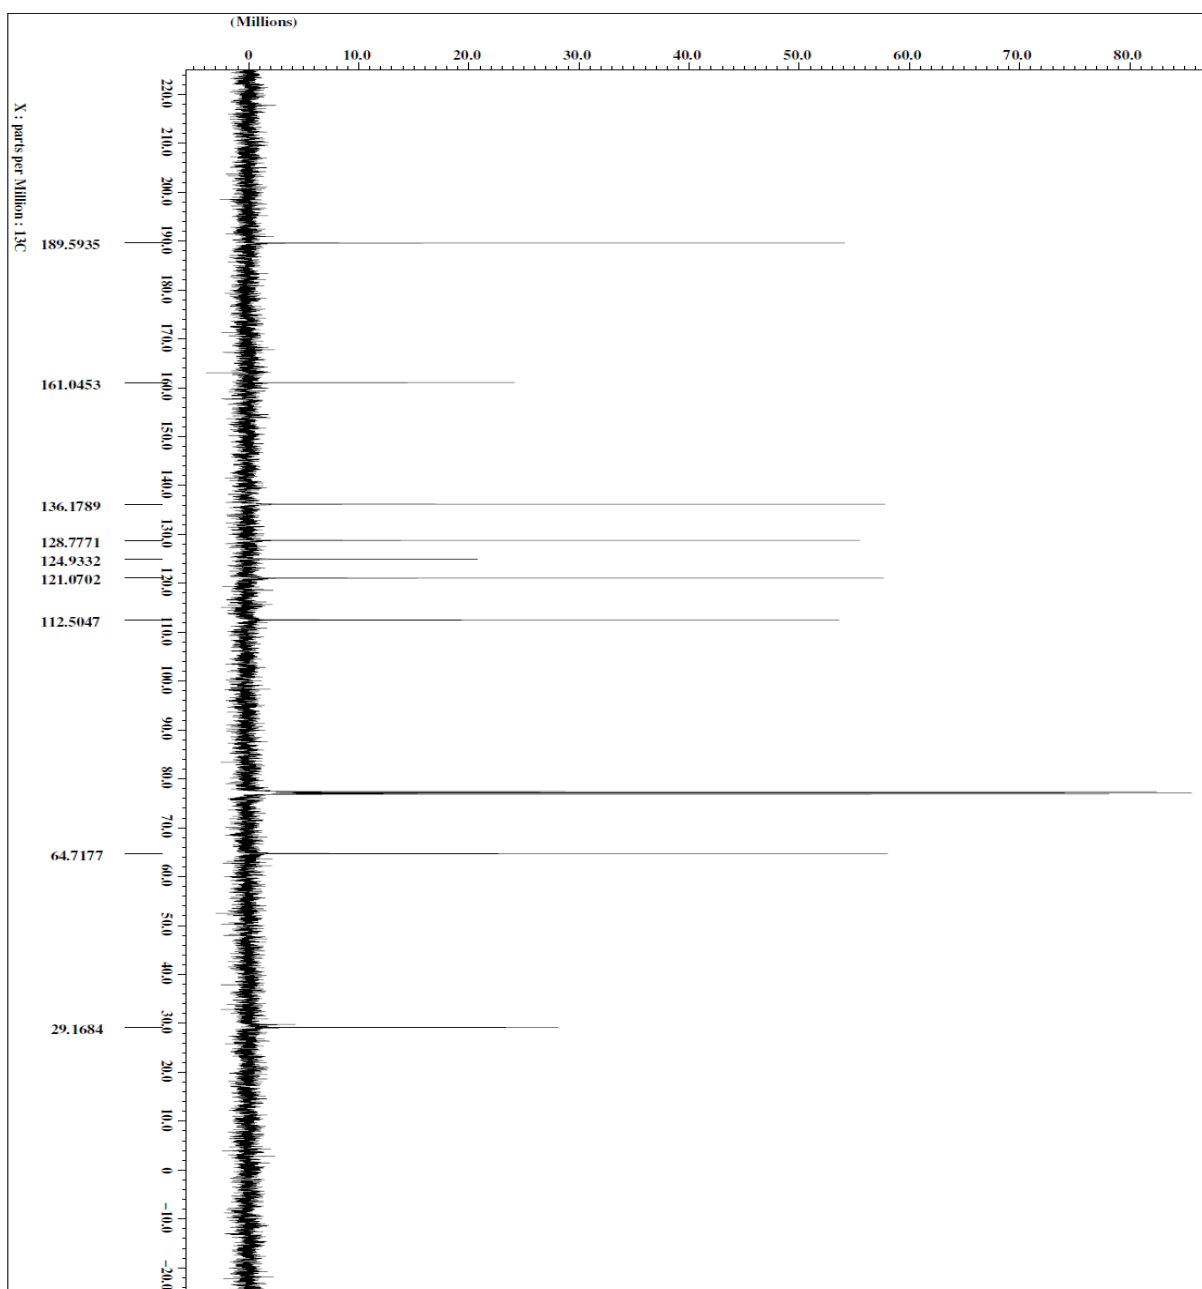

**Figure S36:**  $^{13}\text{C}$  NMR spectral data of SAL

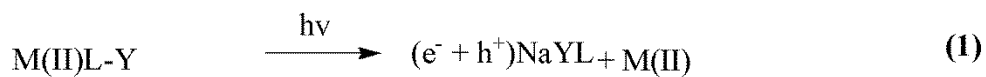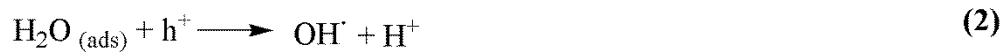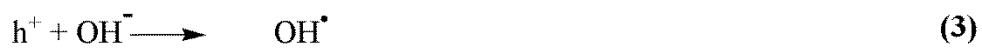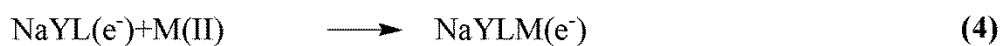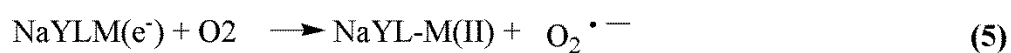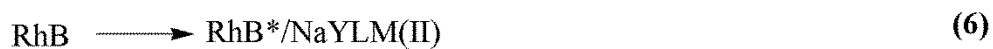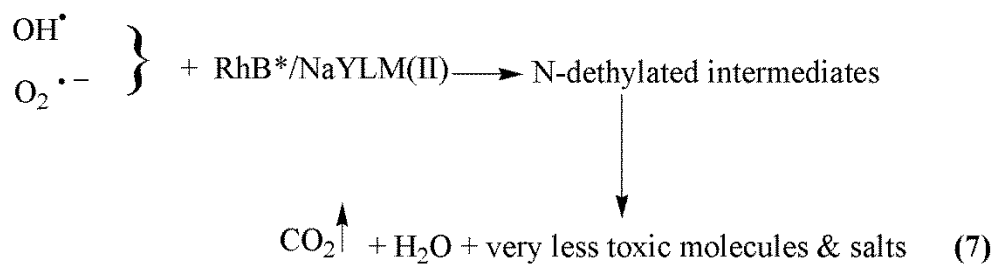

**Figure S38:** Proposed mechanism for the RhB degradation

**Table A:**

| <b>Compound</b>  | <b>Cu(%)</b> | <b>Ni(%)</b> | <b>Si/Al</b> | <b>Na(%)</b> | <b>Si(%)</b> | <b>Al(%)</b> |
|------------------|--------------|--------------|--------------|--------------|--------------|--------------|
| <b>NaY</b>       | -            | -            | 2.69         | 7.81         | 22.12        | 8.21         |
| <b>Ni(II)-Y</b>  | -            | 2.56(2.94)   | 2.69         | 5.23         | 22.24        | 8.24         |
| <b>Cu(II)-Y</b>  | 1.92(2.02)   | -            | 2.69         | 5.02         | 22.75        | 8.45         |
| <b>Ni(II)L-Y</b> | -            | 0.79(0.95)   | 2.61         | 6.16         | 20.48        | 7.25         |
| <b>Cu(II)L-Y</b> | 1.02(1.10)   | -            | 2.58         | 6.83         | 22.39        | 8.68         |

**Table B:**

| <b>Compound</b>                          | <b>Colour</b> | <b>%M</b>   |
|------------------------------------------|---------------|-------------|
| <b>NiL (ClO<sub>4</sub>)<sub>2</sub></b> | Yellow        | 8.2(8.5)    |
| <b>CuL (ClO<sub>4</sub>)<sub>2</sub></b> | Olive green   | 10.3(10.42) |
| <b>Ni(II)-Y</b>                          | Pale green    | 2.5         |
| <b>Cu(II)-Y</b>                          | Pale blue     | 1.9         |
| <b>Ni(II)L-Y</b>                         | Pale yellow   | 0.78        |
| <b>Cu(II)L-Y</b>                         | pale green    | 1.02        |
| <b>Ni(II)L-Y<br/>(Recovered)</b>         | Pale yellow   | 0.75        |
| <b>Cu(II)L-Y<br/>(Recovered)</b>         | pale green    | 0.93        |
